# Supplementary material
Source: PubMed Central journal article supplement (PMC7727350)
Supplement: ocaa193_supplementary_data.pdf [file ocaa193_supplementary_data.pdf]

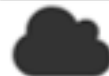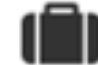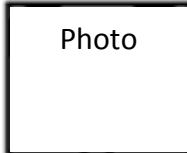

Photo

MRN: 245-3049  
[Code Status](#)

DOB: 01/17/2014  
Age: 3  
Sex: Male

[ID Statement](#)

[Primary provider contact](#)

## QUICK REFERENCES

Problem List

Baseline Equipment

Medications

Allergies

Visit Summaries

## ARCHIVES

Family Corner

Patient History

Management

## Care Plan Folders

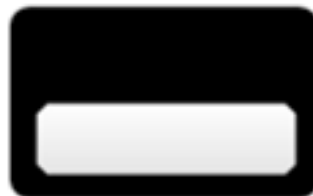

Neurology

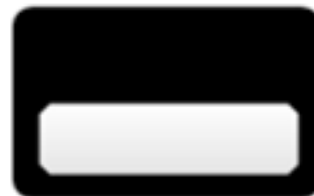

Pulmonary

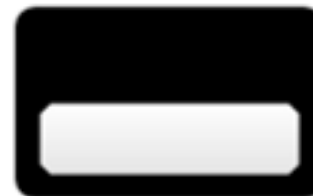

Cardiology

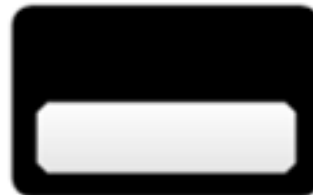

Orthopedics

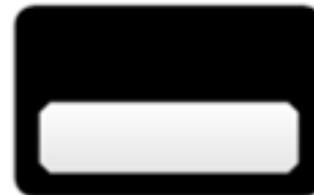

GI

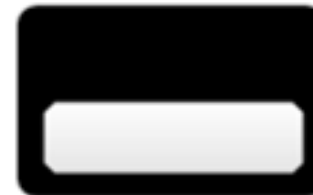

Hematology

**SUPPLEMENT FIGURE 1.** Early design of LCP home page for a desktop interface. Content was organized by specialty folders representing different body systems (i.e. system-based organization).

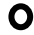

Emergency Care Plan

Active Issues/Care Plans

Medication List

Care Team

Appointments/Referrals

Task List

Diet/Nutrition

Medical Equipment

About Child

Daily Management Schedule

Major Events Timeline

Family Notes

THIS PAGE CAN ONLY BE EDITED BY HEALTHCARE PROVIDERS

PAGE UPDATED 04/17/2019

## Neurodevelopment Care Plan

Primary Specialty Provider: [First Last Name] (Neurodevelopment ARNP); [First Last Name] (Nutritionist)

**ACTIVE ISSUE:** Asymmetrical gluteal cleft (with simple sacral dimple)

**Common presenting problems:** - - -

### WELL PLAN

### SICK PLAN

#### If concerned for tethered cord:

- May need spine MRI to evaluate. Parents do not want sedation with intubation. [Provider X] inquiring whether this can be done without anesthesia.

**ACTIVE ISSUE:** Dysphagia (GJ tube dependence)

**Common presenting problems:** Silent aspiration

### WELL PLAN

### SICK PLAN

- Click here for [Diet/Nutrition plan](#).
- [Vitamin D](#) supplementation.
- Click here for [GJ tube dysfunction or need for replacement](#).

### SUPPLEMENT FIGURE 2.

Early design of LCP in which active issues were organized within specialty folders (e.g. neurodevelopment) consistent with a “systems-based” organizational schema.
